# Supplementary material for: Habits and beliefs related to food supplements: Results of a survey among Italian students of different education fields and levels
Source: PubMed Central journal article supplement (PMC5774790; doi:10.1371/journal.pone.0191424), 2018-01-19
Supplement: pone.0191424.s001.pdf [file pone.0191424.s001.pdf]

**Reference values for daily intakes of the vitamins and minerals which are essential in human nutrition.**

| <b>Supplement</b>    | <b>PRI or AI according to EFSA [3]</b> |           |      | <b>RDI according to FDA [4]</b> |
|----------------------|----------------------------------------|-----------|------|---------------------------------|
| Biotin (µg)          | 40                                     |           |      | 30                              |
| Calcium (mg)         | 18-24y                                 | M         | 1000 | 1300                            |
|                      |                                        | F         | 1000 |                                 |
|                      | ≥25y                                   | M         | 950  |                                 |
|                      |                                        | F         | 950  |                                 |
| Chloride (mg)        | 800                                    |           |      | 2300                            |
| Choline (mg)         | 400                                    |           |      | 550                             |
| Chromium (µg)        | 40                                     |           |      | 35                              |
| Copper (mg)          | M                                      | 1.6       |      | 0.9                             |
|                      | F                                      | 1.3       |      |                                 |
| Fluoride (mg)        | M                                      | 3.4       |      | -                               |
|                      | F                                      | 2.9       |      |                                 |
| Folate (µg DFE)      | 330                                    |           |      | 400                             |
| Iodine (µg)          | 150                                    |           |      | 150                             |
| Iron (mg)            | M                                      | 11        |      | 18                              |
|                      | F                                      | premenop  | 16   |                                 |
|                      |                                        | postmenop | 11   |                                 |
| Magnesium (mg)       | M                                      | 350       |      | 420                             |
|                      | F                                      | 300       |      |                                 |
| Manganese (mg)       | 3                                      |           |      | 2.3                             |
| Molybdenum (µg)      | 65                                     |           |      | 45                              |
| Niacin (mg NE)       | 1.6/megajoul                           |           |      | 16                              |
| Panhotenic acid (mg) | 5                                      |           |      | 5                               |
| Phosphorus (mg)      | 550                                    |           |      | 1250                            |
| Potassium (mg)       | 3500                                   |           |      | 4700                            |
| Riboflavin (mg)      | 1.6                                    |           |      | 1.3                             |
| Selenium (µg)        | 70                                     |           |      | 55                              |
| Thiamin (mg)         | 0.1/megajoul                           |           |      | 1.2                             |

|                  |    |           |     |
|------------------|----|-----------|-----|
| Vitamin A (µg)   | M  | 750       | 900 |
|                  | F  | 650       |     |
| Vitamin B12 (µg) | 4  |           | 2.4 |
| Vitamin B6 (mg)  | M  | 1.7       | 1.7 |
|                  | F  | 1.6       |     |
| Vitamin C (mg)   | M  | 110       | 90  |
|                  | F  | 95        |     |
| Vitamin D (µg)   | 15 |           | 20  |
| Vitamin E (mg)   | M  | 13        | 15  |
|                  | F  | 11        |     |
| Vitamin K (µg)   | 70 |           | 120 |
| Zinc (mg)        | M  | 9.4-16.3* | 11  |
|                  | F  | 7.5-12.7* |     |

AI, average intake (the average observed daily level of intake by a population group of apparently healthy people that is assumed to be adequate; this value is used when the PRI could not be established); F, female; M, male; DFE, dietary folate equivalents; NE, niacin equivalent; PRI, population reference intake (the level of nutrient intake that is adequate for virtually all people in a population group); RDI, reference daily intake.

\* depending on the level of phytate intake.
