# Supplementary material for: Habits and beliefs related to food supplements: Results of a survey among Italian students of different education fields and levels
Source: PubMed Central journal article supplement (PMC5774790; doi:10.1371/journal.pone.0191424), 2018-01-19
Supplement: pone.0191424.s002.pdf [file pone.0191424.s002.pdf]

## Abitudini e opinioni degli studenti italiani in merito agli integratori alimentari

1. Et : .....anni

2. Sesso:

Maschio

Femmina

3. Livello di istruzione:

Studente Universitario – Corso di Laurea in Medicina e Chirurgia

Studente Universitario – corso di laurea in professioni sanitarie

Studente Universitario – altro corso di laurea

Studente delle scuole superiori

4. Hai praticato attivit  sportiva per almeno tre mesi consecutivi negli ultimi 12 mesi?

S , (specificare sport ...)

No

5. Se s , quanti allenamenti a settimana?

1 2 3 4 5 6 7  >7 (specificare ...)

6. Se s , quanto dura in media un allenamento (in minuti)?

30

45

60

90

120

>120 (specificare ...)

7. Sai cosa sono gli integratori alimentari?

S 

No

8. Attualmente assumi oppure hai assunto in passato integratori alimentari?

S 

No

Se hai risposto **SI** alla domanda precedente, rispondi a **tutte** le seguenti domande dalla 9 alla 19.

Se hai risposto **NO** alla domanda precedente, **salta** le domande dalla 9 alla 14 e **rispondi solo** alle domande dalla 15 alla 19.

### **ABITUDINI CORRELATE AGLI INTEGRATORI ALIMENTARI**

9. Quali integratori alimentari usi attualmente oppure hai utilizzato in passato?

(  consentita pi  di una risposta)

Aminoacidi a catena ramificata (BCAA), Proteine in polvere, Creatina

Multivitaminici

Sport drinks

Prodotti dimagranti

Stimolanti (caff ina in capsule, guaran , ginseng)

Altro (specificare) ...

10. Quante volte a settimana assumi oppure hai assunto integratori alimentari?

1

2

3

4

5

6

7

>7 (specificare ...)

11. Chi ha influenzato la tua decisione di utilizzare integratori alimentari?

(  consentita pi  di una risposta)

- Nessuno
- Allenatore
- Amici/colleghi
- Medico
- Farmacista
- Genitori
- Internet
- Pubblicità
- Altro (specificare) ...

**12. In che occasione assumi integratori alimentari?**

- In associazione all'attività sportiva
- Periodicamente durante l'anno (ad esempio in associazione ai cambiamenti di stagione)
- Quando avverto uno stato di astenia
- Sporadicamente, senza una particolare cadenza

**13. Come hai stabilito la quantità di integratore alimentare da assumere?  
(è consentita più di una risposta)**

- Su consiglio del venditore
- Su consiglio dell'allenatore
- In base alle informazioni sulla scheda tecnica del prodotto
- In base alle informazioni trovate in Internet
- Calcolando la dose in base al peso corporeo
- Arbitrariamente

**14. Quali effetti collaterali (se presenti) hai percepito durante l'utilizzo di integratori alimentari?**

**(è consentita più di una risposta)**

- Nessuno
- Nausea/vomito
- Diarrea
- Stipsi
- Dolore addominale
- Cefalea
- Altro (specificare) ...

**OPINIONI CORRELATE AGLI INTEGRATORI ALIMENTARI**

**15. Qual è la principale ragione per cui vengono utilizzati integratori alimentari?  
(è consentita più di una risposta)**

- Per migliorare la performance sportiva
- Per migliorare lo stato generale di salute e di benessere
- Per aumentare il peso corporeo
- Per ridurre il peso corporeo
- Per sostituire un pasto
- Per migliorare la performance mentale/cognitiva

**16. Come giudichi l'effetto degli integratori alimentari quando assunti per il motivo che hai indicato sopra?**

- efficaci

- piuttosto efficaci
- piuttosto non efficaci
- non efficaci

**17. Su una scala da 1 a 10, come valuti l'impatto degli integratori alimentari sulla performance sportiva? (1 – nessun impatto, 10 - massimo impatto)**

- 1    2    3    4    5    6    7    8    9    10

**18. Su una scala da 1 a 10, come valuti la sicurezza degli integratori alimentari per la salute? (1 – completamente sicuri, 10 – completamente dannosi)**

- 1    2    3    4    5    6    7    8    9    10

**19. Indica il tuo livello di accordo o disaccordo con le seguenti affermazioni riguardanti gli integratori alimentari.**

|                                                                                         | <b>Assolutamente d'accordo</b> | <b>D'accordo</b> | <b>Neutrale</b> | <b>In disaccordo</b> | <b>Assolutamente in disaccordo</b> |
|-----------------------------------------------------------------------------------------|--------------------------------|------------------|-----------------|----------------------|------------------------------------|
| <b>Gli integratori alimentari sono necessari in ogni fascia di età</b>                  |                                |                  |                 |                      |                                    |
| <b>Gli integratori alimentari sono sicuri da usare</b>                                  |                                |                  |                 |                      |                                    |
| <b>L'assunzione regolare di integratori alimentari può prevenire malattie croniche</b>  |                                |                  |                 |                      |                                    |
| <b>L'assunzione regolare di integratori alimentari può prevenire patologie tumorali</b> |                                |                  |                 |                      |                                    |

## Habits and beliefs related to food supplementation among Italian students

1. **Age:** .....years

2. **Gender:**

- Male  
 Female

3. **Education:**

- University student - Medicine and Surgery programme  
 University student - Health Sciences programme  
 University student - another programme  
 High school student

4. **Have you practiced any sport for at least three consecutive months in the last 12 months?**

- Yes (please specify ...)                       No

5. **If yes, how many practice sessions per week?**

- 1    2    3    4    5    6    7    >7 (specify ...)

6. **If yes, how long was an average practice session (in minutes)?**

- 30    45    60    90    120    >120 (specify ...)

7. **Do you know what food supplements are?**

- Yes                       No

8. **Have you ever consumed any type of food supplement?**

- Yes                       No

If you answered **YES** to the above question, please answer **all** the following questions **9-19**.

If you answered **NO** to the above question, please **skip** the questions **9-14** and **answer only** the questions **15-19**.

### **HABITS RELATED TO FOOD SUPPLEMENTATION**

9. **What types of food supplements have you consumed?**

(more than one answer is allowed)

- Branched-Chain Amino Acids (BCAAs), Proteins powder, Creatine  
 Multivitamins  
 Sport drinks  
 Weight-loss products  
 Stimulants (caffeine pills, guaranà, ginseng)  
 Other (please specify ...)

10. **How many times per week have you taken food supplements?**

- 1    2    3    4    5    6    7    >7 (please specify.....)

11. **Who influenced your decision to use food supplements?**

(more than one answer is allowed)

- No one
- Trainer/Coach
- Friend/coworker
- Medical Doctor
- Pharmacist
- Parents
- Internet
- Media advertising
- Other (please specify...)

**12. Under what circumstances have you taken food supplements?**

- In association with sport activity
- Periodically throughout the year (e.g. in association with season changes)
- When I perceive physical weakness
- Sporadically, without any particular pattern

**13. How have you established the amount of food supplement you should take?  
(more than one answer is allowed)**

- Based on a seller's advice
- Based on a trainer/coach's advice
- Based on an indication in the product information leaflet
- Found information on internet
- Calculated based on body weight
- Arbitrarily

**14. What side effects (if any) have you experienced whilst taking food supplements?  
(more than one answer is allowed)**

- None
- Nausea/vomiting
- Diarrhoea
- Constipation
- Abdominal pain
- Headaches
- Other (please specify...)

**BELIEFS RELATED TO FOOD SUPPLEMENTS**

**15. What is the purpose for consuming food supplements?**

- To enhance sport performance
- To enhance overall health and wellness
- To gain weight
- To lose weight
- To replace a skipped meal
- To enhance mental/cognitive performance

**16. In your opinion, how effective are food supplements, when taken for the purpose that you indicated above?**

- effective
- rather effective
- rather ineffective

ineffective

**17. On a scale of 1 to 10, how would you rate the impact of food supplements on sport performance? (1 - no impact, 10 - the highest impact)**

1    2    3    4    5    6    7    8    9    10

**18. On a scale of 1 to 10, how would you rate the safety of food supplements? (1 - completely safe to health, 10 - extremely harmful to health)**

1    2    3    4    5    6    7    8    9    10

**19. Indicate to what level you agree or disagree with the following statements regarding food supplements:**

|                                                                    | <b>Strongly agree</b> | <b>Agree</b> | <b>Neither agree nor disagree</b> | <b>Disagree</b> | <b>Strongly disagree</b> |
|--------------------------------------------------------------------|-----------------------|--------------|-----------------------------------|-----------------|--------------------------|
| <b>Food supplements are necessary at all ages</b>                  |                       |              |                                   |                 |                          |
| <b>Food supplements are essentially harmless</b>                   |                       |              |                                   |                 |                          |
| <b>Regular food supplement intake can prevent chronic diseases</b> |                       |              |                                   |                 |                          |
| <b>Regular food supplement intake can prevent cancer</b>           |                       |              |                                   |                 |                          |
